# Supplementary material
Source: publisher figshare collection journal article supplement (https://gsajournals.figshare.com/ndownloader/files/23320736)

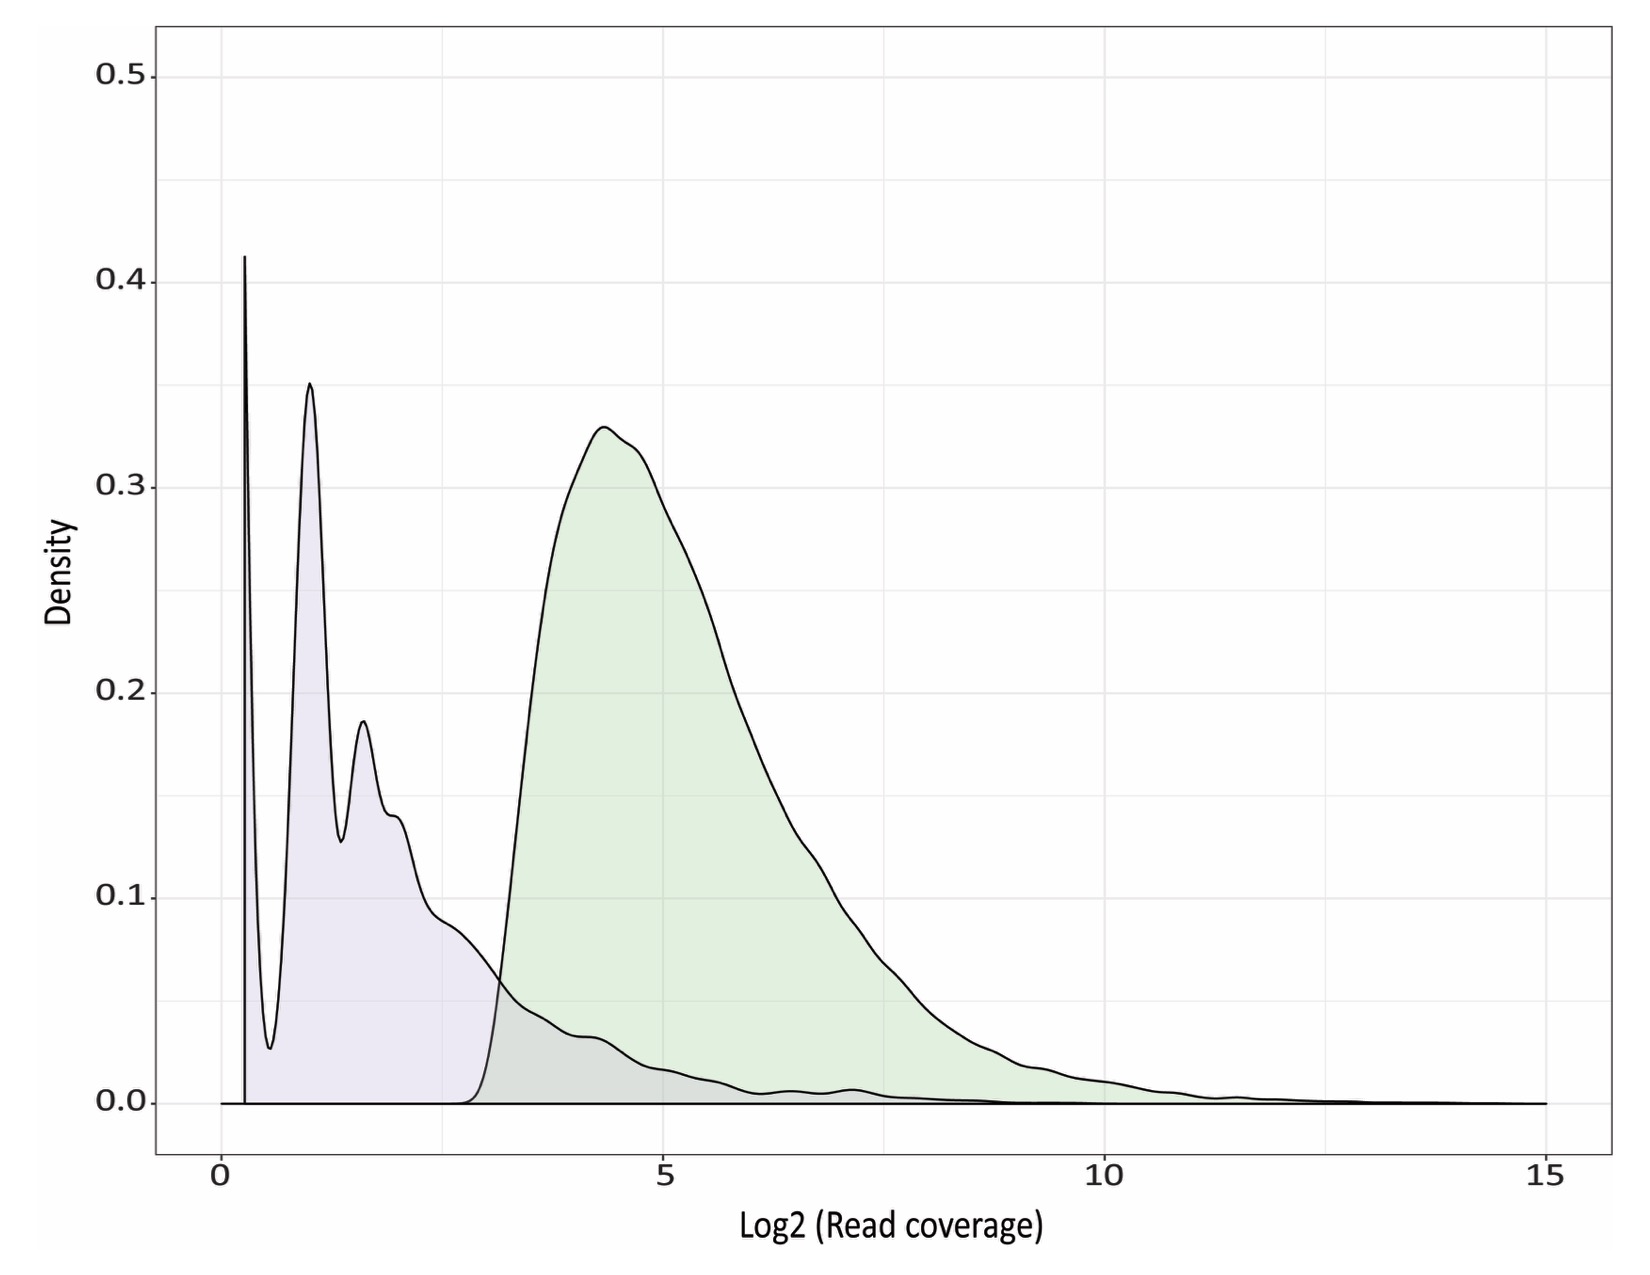

Supplement: Supplementary file 1 [file 23320736]
